# Supplementary material for: Reduced methylammonium triple-cation Rb0.05(FAPbI3)0.95(MAPbBr3)0.05perovskite solar cells based on a TiO2/SnO2bilayer electron transport layer approaching a stabilized 21% efficiency: the role of antisolvents
Source: Royal Society of Chemistry journal article supplement (doi:10.1039/c9ta05422g), 2019-01-01
Supplement: c9ta05422g1.pdf [file c9ta05422g1.pdf]

## Supporting Information

### **Reduced methylammonium, triple-cation $\text{Rb}_{0.05}(\text{FAPbI}_3)_{0.95}(\text{MAPbBr}_3)_{0.05}$ perovskite solar cells based on $\text{TiO}_2/\text{SnO}_2$ bilayered electron transporting layer approaching 21% efficiency: Role of TFT antisolvent**

**Sawanta S. Mali,<sup>a</sup> Jyoti V. Patil,<sup>a</sup> Hamidreza Arandiyan,<sup>b</sup> Chang Kook Hong<sup>\* a</sup>**

## Materials and Methods

### Materials

All of the chemicals and materials were purchased and used without further purification. Materials including solvents (N, N-Dimethylformamide (DMF), Dimethyl sulfoxide (DMSO), diethyl sulfide (98%),  $\text{PbI}_2$  (99%),  $\text{RbI}$  (99.9% Sigma-Aldrich) and tin(II) chloride hydrate ( $\text{SnCl}_2 \cdot 2\text{H}_2\text{O}$ , >98 %, Sigma-Aldrich) were purchased from Sigma-Aldrich and used as received. Hydroiodic acid (aqueous, 57 wt %, Sigma-Aldrich) to a solution of methylamine (aqueous, 40 wt %, TCI Chemicals), formamidine acetate (Sigma-Aldrich) was used for preparation of MAI, FAI. For HTM preparation toluene (99%, Sigma Aldrich), acetonitrile (99.8% Sigma-Aldrich) and 4-tert-butylpyridine (TBP, 96%, Aldrich) solvents were used. Antisolvents such as chlorobenzene (CB, >99 % Sigma Aldrich), diethyl-ether (>99 % Sigma Aldrich) and  $\alpha,\alpha,\alpha$ -Trifluorotoluene (TFT, >99% Sigma-Aldrich) have been used as received.

### Methods

#### Preparation of c- $\text{TiO}_2$ and $\text{TiO}_2/\text{SnO}_2$ bilayer Electron transport layer (ETL)

Laser-patterned FTO-coated glass substrates (TEC-8, Pilkington) were ultrasonically cleaned in an alkaline aqueous solution, rinsed with deionized water, acetone, ethanol and then treated with UV-ozone for 15 min. Nearly 60-80 nm thin compact blocking  $\text{TiO}_2$  (Bl- $\text{TiO}_2$ ) layer was deposited on the substrates by spin coating the  $\text{TiO}_2$  precursor and then annealing the spin-coated precursor in air at 450 °C for 30 min. The precursor composition was as follows: 1 ml commercial titanium isopropoxide solution (Sigma-Aldrich) that was diluted in ethanol containing 12M HCl. The  $\text{SnO}_2$  bilayer on  $\text{TiO}_2$  ETL was achieved by using 0.05 M tin (II) chloride hydrate [ $\text{SnCl}_2 \cdot 2\text{H}_2\text{O}$ ] in ethanol was spin coated at 3000 rpm for 20 sec followed by 45 min annealing at 180 °C.

## Synthesis of the perovskite precursors and their solution

The FAI, MABr were synthesized as per our reports.<sup>[S1, S2]</sup> Briefly, methylamine solution, formamidine acetate powder were separately reacted with hydroiodic acid (57% in water, Aldrich) and hydrobromic acid (HBr) for the preparation of MABr and FAI. The reactions were carried out in a 250 ml round-bottomed flask at 0°C for 2 h with stirring. The precipitates were recovered by evaporating the solutions at 60°C for 2 h. The products were dissolved in ethanol or methanol, recrystallized using diethyl ether, and finally dried at 60 °C in a vacuum oven for 24 h. For FAPbX/MAPbX precursors was synthesized by reacting FAI, MABr, PbI<sub>2</sub>, and PbBr<sub>2</sub> powder with desired amount in DMF/DMSO (4:1 v/v%) solution. Desired volume (5%) of RbI in DMF:DMSO (4:1) was added in above solution to make Rb<sub>0.05</sub>[(FAPbI<sub>3</sub>)<sub>0.95</sub>(MAPbBr<sub>3</sub>)<sub>0.05</sub>]<sub>0.95</sub>. The clear filtered yellow solution was spin coated on the top of the FTO/TiO<sub>2</sub> as well as FTO/TiO<sub>2</sub>/SnO<sub>2</sub> ETLs by a consecutive two-step spin coating process at 1,000 and 6,000 rpm for 10 and 30 s, respectively. 100 µl of CB, 1 ml diethyl-ether or 200 µl of TFT was drop-cast during the second spin-coating step followed by a heat treatment (130°C) on a hot plate for 10 min to form dark-black colored crystalline Rb<sub>0.05</sub>(FAPbI<sub>3</sub>)<sub>0.95</sub>(MAPbBr<sub>3</sub>)<sub>0.05</sub> thin film.

## Preparation of PTAA based HTM

The hole transport material (HTM) was prepared by as per our previous report [S3]. The 15 mg of a poly[bis(4-phenyl)(2,4,6-trimethylphenyl)amine] (PTAA, sigma Aldrich) dissolved in 1.5 mL toluene (99.8%, Aldrich) with addition of 15 µL bis(trifluoromethane) sulfonimide lithium salt (LiTFSI, 99.95%, Aldrich) (170mgml<sup>-1</sup>) in acetonitrile and 7.5 µL 4-tert-butylpyridine (TBP, 96%, Aldrich). The prepared PTAA HTM solution was spin-coated on the FTO/TiO<sub>2</sub>/SnO<sub>2</sub>/perovskite electrode at 3,000 rpm for 30s. Then the substrates were transferred to a vacuum chamber and evacuated to a pressure of 2×10<sup>-6</sup> mbar. For the counter

electrode, a 80 nm thick Au contacts were deposited on the top of the HTM over layer by a thermal evaporation (growth rate  $\sim 0.5 \text{ \AA/s}$ ). Precaution was taken for each step as per previous literature. The active area of this electrode was fixed at  $0.09 \text{ cm}^2$ . An active area was calculated as per gold and laser pattern cross-sectional area. The exact illumination to the active area was fixed by attaching metal shadow mask from back side during measurements.

### ***Characterizations***

The top-surface and cross-sectional images were recorded by a field emission scanning electron microscope (FESEM; S-4700, Hitachi). X-ray diffraction (XRD) measurements were carried out using a D/MAX Ultima III XRD spectrometer (Rigaku, Japan) with Cu K line of  $1.5410 \text{ \AA}$ . The photoluminescence (PL) spectra were measured using photoluminescence spectrometer ( $f=0.5\text{m}$ , Acton Research Co., Spectrograph 500i, USA), and an intensified CCD (PI-MAX3) (Princeton Instrument Co., IRY1024, USA). The DPSS (Diode pumped solid state) laser (Ekspla) with a wavelength of  $266 \text{ nm}$  and a power of  $310 \text{ mW}$  was utilized as an excitation source for PL measurement.

### ***Photovoltaic studies***

The cells were illuminated using a solar simulator at AM 1.5 G for 10 s, for which the light intensity was adjusted to 1 sun intensity ( $100 \text{ mW cm}^{-2}$ ) through the use of an NREL-calibrated Si solar cell with a KG-5 filter. The spectral response was taken by an spectral IPCE measurement system (K3100, McScience), which was equipped with a monochromator, a K240 XE 300 lamp source connected with K401 OLS XE300W lamp Power supply and a K102 Signal amplifier. Prior to the use of the light, the spectral response and the light intensity were calibrated using a Si-photodiode (Model: S1337-1010BQ) and InGaAs photodiode (model: G12180-050A) for 300-1100 nm and 1100-1400 nm calibration respectively. Measurements were taken in EQE mode.

Time-resolved photoluminescence (PL) decay transients were measured at  $800\pm 20\text{nm}$  using excitation with a 470 nm light pulse at a frequency of 5MHz from the Spectrophotometer F-7000.

### **Device stability**

The device stability was tested in air at 80 °C without any encapsulation.

**Figure S1** (a,b) Cross sectional SEM micrographs of monolayer  $\text{TiO}_2$  and  $\text{TiO}_2/\text{SnO}_2$  bilayer ETL, (c,d) respective perovskite precursor solution contact angle

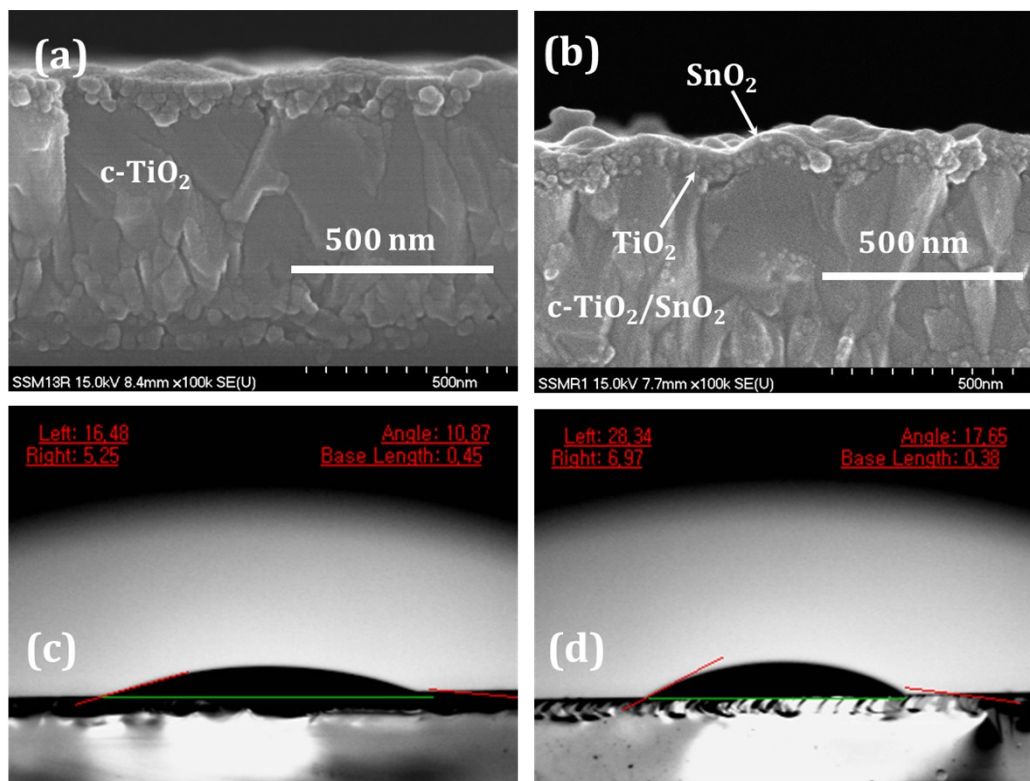

Fig. S2 Survey spectrum of c-TiO<sub>2</sub> and TiO<sub>2</sub>/SnO<sub>2</sub> bilayer ETL thin films.

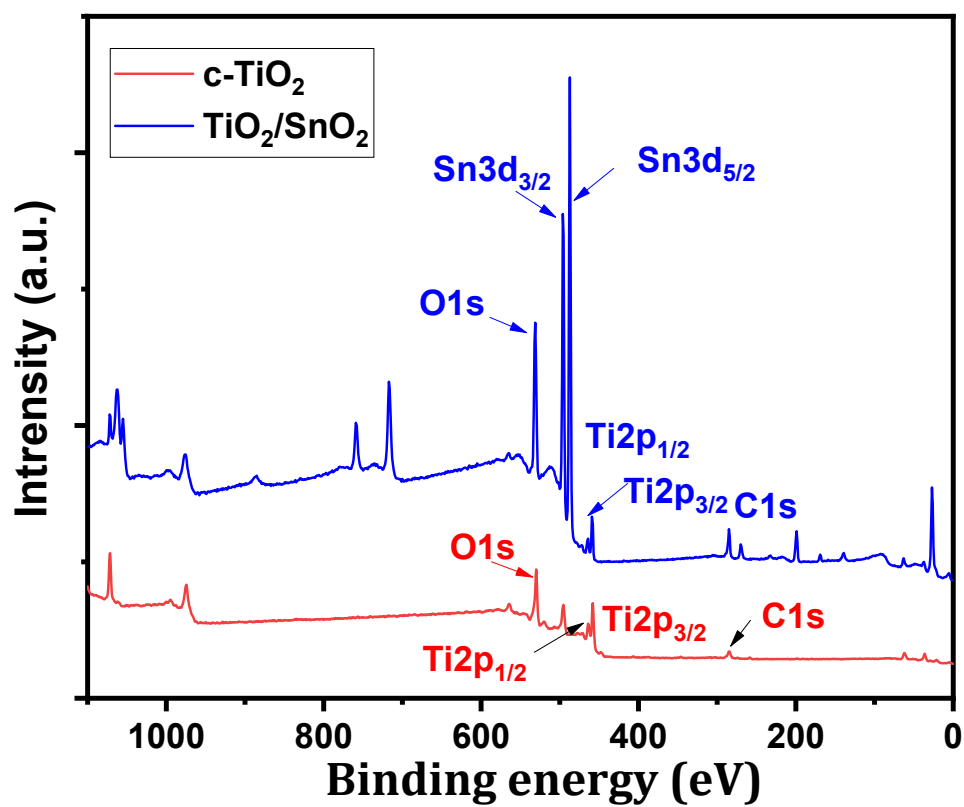

**Figure S3a** Top-view and cross sectional micrographs of Perovskite thin film deposited by using different antisolvent on single and bilayer ETL.

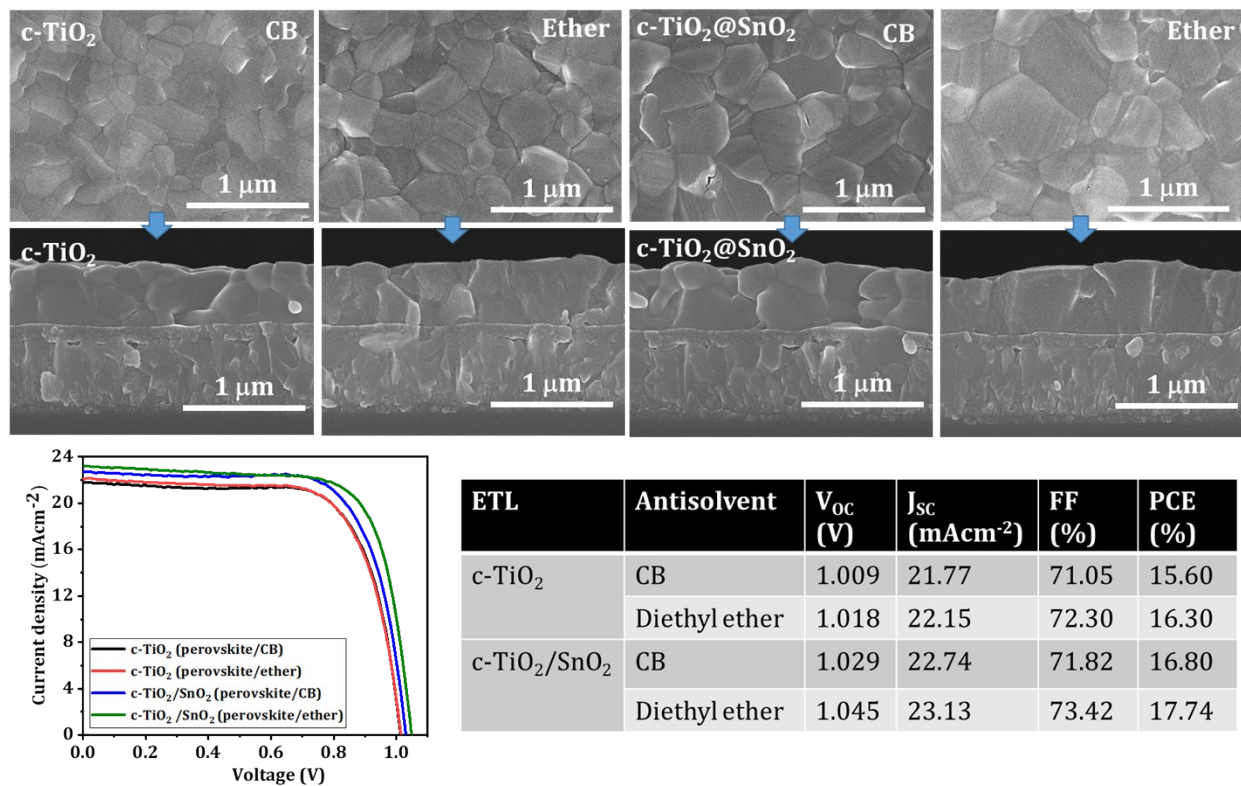

**Figure S3b** Low-magnification top-view micrograph of Perovskite thin film deposited on c-TiO<sub>2</sub>/SnO<sub>2</sub> ETL bilayer ETL with TBT anti-solvent.

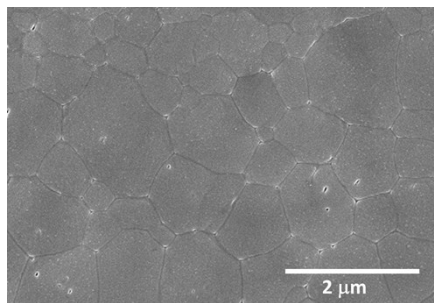

**Fig. S4** XRD patterns of FAPbI<sub>3</sub> perovskite and its conventional mixed composition with ratio 0.85:15 (FA:MA) and modified 0.95:0.05 (FAMA) for fresh and annealing at 130 °C for 3 hours.

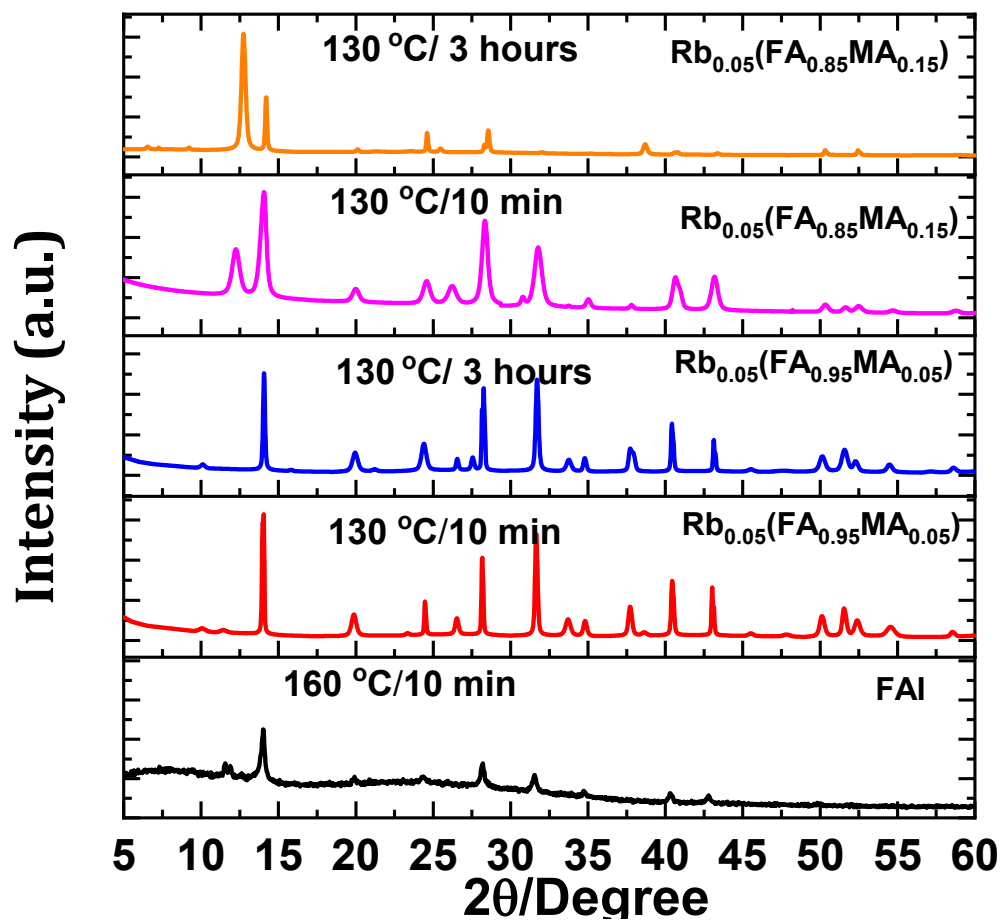

**Fig. S9** Thermal-stability at 80 °C at 35 % RH of  $(\text{FAPbI}_3)_{0.85}(\text{MAPbI}_3)_{0.15}$  and  $\text{Rb}_{0.05}(\text{FAPbI}_3)_{0.85}(\text{MAPbI}_3)_{0.15}$  composition for bilayered ETL based perovskite solar cells

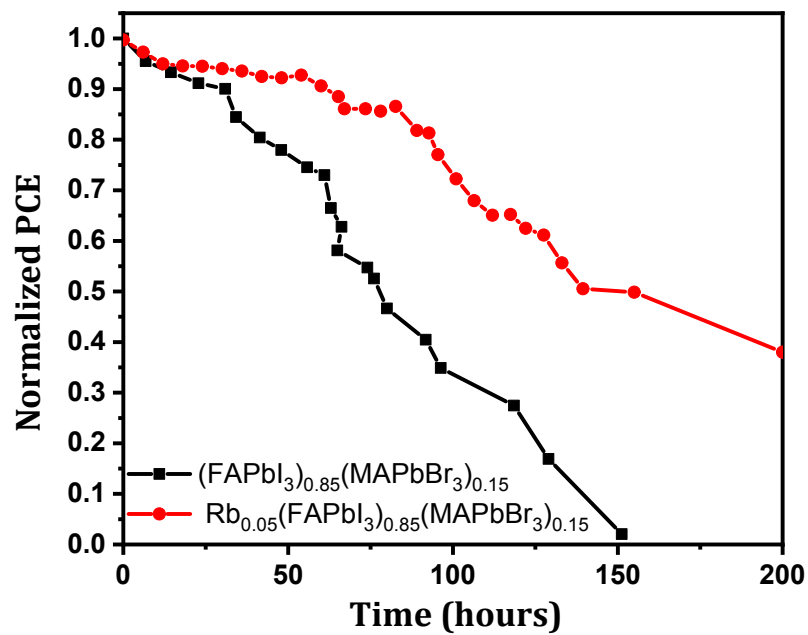

**Table S1** Literature survey for pristine, doped SnO<sub>2</sub> ETL and bilayer ETLs for planar perovskite solar cell

| ETL                                                            | PSCs device configuration*                                                                                   | V <sub>oc</sub><br>(V) | J <sub>sc</sub><br>(mAcm <sup>-2</sup> ) | FF<br>(%) | PCE<br>(%) | Antisolvent      | Ref                                       |
|----------------------------------------------------------------|--------------------------------------------------------------------------------------------------------------|------------------------|------------------------------------------|-----------|------------|------------------|-------------------------------------------|
| <b>Doped and bilayer SnO<sub>2</sub></b>                       |                                                                                                              |                        |                                          |           |            |                  |                                           |
| SnO <sub>2</sub>                                               | FTO/SnO <sub>2</sub> /MAPbI <sub>3</sub> /spiro                                                              | 1.11                   | 23.27                                    | 67.0      | 17.21      | N/A              | J. Am. Chem. Soc. 2015, 137, 6730–6733.   |
| SnO <sub>2</sub>                                               | FTO/SnO <sub>2</sub> /FAMA/spiro                                                                             | 1.14                   | 21.3                                     | 74.0      | 18.4       | N/A              | Energy Environ. Sci., 2015, 8, 2928—2934  |
| SnO <sub>2</sub>                                               | FTO/SnO <sub>2</sub> /CsFAMA/spiro                                                                           | 1.144                  | 22.64                                    | 74        | 19.17      | Diethyl ether    | J. Mater. Chem. A, 2017, 5, 24790–24803   |
| Li: SnO <sub>2</sub>                                           | FTO/Li:SnO <sub>2</sub> /MAPbI <sub>3</sub> /Spiro                                                           | 1.106                  | 23.27                                    | 70        | 18.20      | Diethyl ether    | Nano Energy 2016, 26, 208                 |
| Sb-doped SnO <sub>2</sub>                                      | ITO/Sb:SnO <sub>2</sub> /MAPbI <sub>3</sub> /Spiro                                                           | 1.06                   | 22.6                                     | 72        | 17.2       | Two steps<br>N/A | ChemSusChem 2016, 9, 2689                 |
| Nb:SnO <sub>2</sub>                                            | FTO/Nb:SnO <sub>2</sub> /(FAPbI <sub>3</sub> ) <sub>0.85</sub> (MAPbBr <sub>3</sub> ) <sub>0.15</sub> /Spiro | 1.08                   | 22.36                                    | 72.7      | 17.57      | CB               | ACS Appl. Mater. Interfaces 2017, 9, 2421 |
| Y: SnO <sub>2</sub>                                            | FTO/Y: SnO <sub>2</sub> /MAPbI <sub>3</sub> /Spiro                                                           | 1.08                   | 22.55                                    | 71        | 17.29      | Diethyl ether    | Small 2017, 13, 1601769                   |
| Mg:SnO <sub>2</sub>                                            | FTO/Mg:SnO <sub>2</sub> /MAPbI <sub>3</sub> /spiro                                                           | 0.991                  | 20.92                                    | 66.8      | 13.56      | Two step         | J. Mater. Chem. A 2016, 4, 8374           |
| SnO <sub>2</sub> /PVP                                          | ITO/SnO <sub>2</sub> /MAPbICl/spiro                                                                          | 1.15                   | 21.74                                    | 80.9      | 20.23      | N/A              | Sci. Adv. 2017;3: e1700106                |
| SnO <sub>2</sub> /np-SnO <sub>2</sub><br>(cryogenic technique) | FTO/SnO <sub>2</sub> /np-SnO <sub>2</sub> /CsFAMA/spiro                                                      | 1.14                   | 23.5                                     | 80        | 21.4       | N/A              | Adv. Mater. 2018, 1804402                 |
| F:SnO <sub>2</sub><br>bilayer ETL                              | FTO/(F:SnO <sub>2</sub> ) <sub>380-0.2</sub> /(F:SnO <sub>2</sub> ) <sub>180-0.2</sub> /FAMA/spiro           | 1.13                   | 22.92                                    | 78.05     | 20.20      | CB               | Nano Lett. 2018, 18, 3969–3977            |

|                                             |                                                                                                                                                 |       |       |       |       |                    |                                                |
|---------------------------------------------|-------------------------------------------------------------------------------------------------------------------------------------------------|-------|-------|-------|-------|--------------------|------------------------------------------------|
| MgO/SnO <sub>2</sub>                        | FTO/MgO/SnO <sub>2</sub> /MAPbI <sub>3</sub> /Spiro                                                                                             | 1.10  | 22.7  | 73.0  | 18.23 | CB                 | Adv. Sci. 2017, 1700031                        |
| SnO <sub>2</sub> /SAM                       | FTO/SnO <sub>2</sub> /SAM/MAPbI <sub>3</sub> /Spiro                                                                                             | 1.16  | 21.93 | 72.0  | 18.32 | Ethyl ether        | J. Mater. Chem. A 2017, 5, 1658                |
| SnO <sub>2</sub> /PCBM                      | FTO/ SnO <sub>2</sub> /PCBM /MAPbI <sub>3</sub> /Spiro                                                                                          | 1.11  | 21.41 | 76.0  | 18.17 | CB                 | J. Mater. Chem. A, 2016, 4, 14276              |
| SnO <sub>2</sub> /PCBM                      | FA <sub>0.83</sub> Cs <sub>0.17</sub> Pb(I <sub>0.6</sub> Br <sub>0.4</sub> ) <sub>3</sub>                                                      | 1.14  | 19.8  | 75.0  | 16.9  | N/A                | NATURE ENERGY 2, 17135 (2017)                  |
| SnO <sub>2</sub> /PCBM                      | BA <sub>0.05</sub> (FA <sub>0.83</sub> Cs <sub>0.17</sub> ) <sub>0.91</sub> Pb(I <sub>0.8</sub> Br <sub>0.2</sub> ) <sub>3</sub>                | 1.14  | 22.7  | 80.0  | 20.8  | N/A                | NATURE ENERGY 2, 17135 (2017)                  |
| SnO <sub>2</sub> /PCBM                      | FTO/SnO <sub>2</sub> /PCBM/CsFAMA/spiro                                                                                                         | 1.10  | 19.9  | 70.7  | 15.1  | N/A                | Science, 2016, 351, 6269                       |
| SnO <sub>2</sub> /PCBM/PMMA                 | FTO/SnO <sub>2</sub> /PCBM/PMMA/Rb <sub>5</sub> Cs <sub>10</sub> FAPbI <sub>3</sub> /spiro                                                      | 1.080 | 25.06 | 75.5  | 20.35 | CB                 | Science 10.1126/science.aat3583 (2018).        |
| SnO <sub>2</sub> /SnO <sub>2</sub>          | FTO/SnO <sub>2</sub> /SnO <sub>2</sub> /RbFAMA/spiro                                                                                            | 1.17  | 23.1  | -     | 20.3  | CB                 | Energy Environ. Sci., 2018, 11, 78-86          |
| SnO <sub>2</sub> /SnO <sub>2</sub> SC + CBD | FTO/ SnO <sub>2</sub> /SnO <sub>2</sub> SC + CBD CsFAMA/spiro                                                                                   | 1.18  | 22.37 | 77.   | 20.78 | CB                 | Energy Environ. Sci., 2016, 9, 3128—3134       |
| SnO <sub>2</sub> (commercial)               | ITO/SnO <sub>2</sub> /FAI:MABr:MACl/spiro                                                                                                       | 1.12  | 23.86 | 80.6  | 21.6  | Two step           | Adv. Mater. 2017, 29, 1703852                  |
| E-SnO <sub>2</sub>                          | FTO/E-SnO <sub>2</sub> /CsFAMA/spiro                                                                                                            | 1.11  | 24.57 | 79.2  | 21.6  | CB                 | NATURE COMMUNICATIONS   (2018) 9:3239          |
| ZW-SnO <sub>2</sub> (CBD)                   | FTO/ZW-SnO <sub>2</sub> /FAMA/spiro                                                                                                             | 1.16  | 23.6  | 78.4  | 21.43 | CB                 | Energy Environ. Sci., 2018, 10.1039/C8EE02242A |
| TiO <sub>2</sub>                            | MA <sub>0.5</sub> FA <sub>0.5</sub> PbI <sub>3</sub>                                                                                            | 1.063 | 24.39 | 74.87 | 19.41 | Diethyl ether      | Solar Energy 157 (2017) 853–859                |
| a-TiO <sub>2</sub> /a-SnO <sub>2</sub>      | FTO/a-TiO <sub>2</sub> /a-SnO <sub>2</sub> / CsI <sub>0.05</sub> (FAPbI <sub>3</sub> ) <sub>0.85</sub> (MAPbBr <sub>3</sub> ) <sub>0.15</sub> / | 1.169 | 23.91 | 76.5  | 21.4  | CB (1-aminoadamant | Adv. Energy Mater. 2018, 8, 1800794            |

|                                                 |                                                                        |        |       |       |       |                |                                                  |
|-------------------------------------------------|------------------------------------------------------------------------|--------|-------|-------|-------|----------------|--------------------------------------------------|
|                                                 | spiro                                                                  |        |       |       |       | ane 1.5 mg/mL) |                                                  |
| a-TiO <sub>2</sub> /a-SnO <sub>2</sub>          | FTO/ a-TiO <sub>2</sub> /a-SnO <sub>2</sub> /MAPbI <sub>3</sub> /spiro | 1.20   | 22.9  | 76.4  | 21.1  | Toluene        | ACS Energy Lett. 2017, 2, 2667–2673              |
| TiO <sub>2</sub> /SnO <sub>2</sub> (mesoporous) | TiO <sub>2</sub> /SnO <sub>2</sub> /mp-TiO <sub>2</sub> /CsFAMA/spiro  | 1.14   | 23.6  | 77    | 20.8  | CB             | Adv. Energy Mater. 2018, 8, 1700677              |
| <b>Bilayer ETLs</b>                             |                                                                        |        |       |       |       |                |                                                  |
| c-TiO <sub>2</sub>                              | FTO/ c-TiO <sub>2</sub> /CsFAMA/spiro                                  | 1.132  | 21.77 | 76.1  | 18.76 | Diethyl ether  | Energy Environ. Sci., 2018, 11, 960—969          |
| TiO <sub>2</sub> /IL                            | FTO/TiO <sub>2</sub> -IL/MAPbI <sub>3</sub> /PTAA                      | 1.0994 | 22.44 | 78.72 | 19.42 | Two-step N/A   | Energy Environ. Sci., 2016, 9, 3071—3078         |
| TiO <sub>2</sub> /TiO <sub>2</sub> (ALD/SC)     | FTO/TiO <sub>2</sub> /TiO <sub>2</sub> /MAPbI <sub>3</sub> /spiro      | 1.07   | 20.5  | 75.2  | 16.5  | N/A            | small 2017, 13, 1701535                          |
| TiO <sub>2</sub> -ZnO                           | FTO/TiO <sub>2</sub> /MAPbI <sub>3-x</sub> Cl <sub>x</sub> /spiro      | 0.969  | 21.13 | 74.2  | 15.1  | N/A            | ACS Appl. Mater. Interfaces 2016, 8, 29580–29587 |
| TiO <sub>2</sub> /ZnO                           | FTO/ TiO <sub>2</sub> /ZnO/MAPbI <sub>3</sub> /spiro                   | 1.084  | 21.03 | 75.3  | 17.17 | CB             | J. Mater. Chem. A, 2015, 3, 19288–19293          |
| Zn <sub>2</sub> SnO <sub>4</sub>                | FTO/ Zn <sub>2</sub> SnO <sub>4</sub> /FAMAPbI <sub>3</sub> /spiro     | 1.036  | 24.72 | 78.15 | 20.02 | Two step       | ACS Energy Lett. 2018, 3, 2410–2417              |
| TiO <sub>2</sub> /SnO <sub>2</sub>              | FTO/ TiO <sub>2</sub> /SnO <sub>2</sub> /CsFAMA/CuPc/Carbon            | 0.980  | 23.38 | 67.0  | 15.39 | CB             | J. Mater. Chem. A, 2018, 6, 7409                 |
| ZnO NPc/TiO <sub>2</sub>                        | FTO/ZnO/TiO <sub>2</sub> /MAPbI <sub>3</sub> /spiro                    | 1.06   | 18.89 | 71.95 | 14.14 | Diethyl ether  | RSC Adv., 2018, 8, 23019–23026                   |
| ZnO/AZO                                         | FTO/ZnO/AZO/MAPbI <sub>3</sub> /spiro/MoO <sub>3</sub> /Ag             | 1.09   | 20.58 | 19.55 | 16.07 | N/A            | arXiv:1708.03153 [physics.app-ph]                |
| ZnO/MgO-EA <sup>+</sup> (planar)                | FTO/ZnO/MgO-EA/MAPbI <sub>3</sub> /spiro                               | 1.10   | 22.46 | 74.12 | 18.32 | Diethyl ether  | Adv. Mater. 2018, 30, 1705596                    |
| ZnO/MgO-EA <sup>+</sup>                         | FTO/ZnO/MgO-EA/mp-                                                     | 1.12   | 23.08 | 77.56 | 20.05 | Diethyl ether  | Adv. Mater. 2018,                                |

|                                         |                                                                                                                                               |       |       |       |       |               |                               |
|-----------------------------------------|-----------------------------------------------------------------------------------------------------------------------------------------------|-------|-------|-------|-------|---------------|-------------------------------|
| (mesoporous)                            | TiO <sub>2</sub> /MAPbI <sub>3</sub> /spiro                                                                                                   |       |       |       |       |               | 30, 1705596                   |
| ZnO/MgO-EA <sup>+</sup><br>(mesoporous) | FTO/ZnO/MgO-EA/mp-TiO <sub>2</sub> /CsFAMA/spiro                                                                                              | 1.12  | 23.86 | 78.91 | 21.08 | Diethyl ether | Adv. Mater. 2018, 30, 1705596 |
| SnO <sub>2</sub> /MgO<br>(champion)     | FTO/SnO <sub>2</sub> /MgO/MAPbI <sub>3</sub> /spiro                                                                                           | 1.13  | 22.1  | 75.7  | 19.0* | Diethyl ether | Nano Energy 49 (2018) 290–299 |
| TiO <sub>2</sub>                        | FTO/TiO <sub>2</sub> /Rb <sub>0.05</sub> (FAPbI <sub>3</sub> ) <sub>0.95</sub> (MAPbBr <sub>3</sub> ) <sub>0.05</sub> /PTAA                   | 1.09  | 21.77 | 71.05 | 15.60 | CB            | In this work                  |
| TiO <sub>2</sub> /SnO <sub>2</sub>      | FTO/TiO <sub>2</sub> /SnO <sub>2</sub> /Rb <sub>0.05</sub> (FAPbI <sub>3</sub> ) <sub>0.95</sub> (MAPbBr <sub>3</sub> ) <sub>0.05</sub> /PTAA | 1.029 | 22.74 | 71.82 | 16.80 | CB            | In this work                  |
| TiO <sub>2</sub>                        | FTO/TiO <sub>2</sub> /Rb <sub>0.05</sub> (FAPbI <sub>3</sub> ) <sub>0.95</sub> (MAPbBr <sub>3</sub> ) <sub>0.05</sub> /PTAA                   | 1.018 | 22.15 | 72.30 | 16.30 | Diethyl ether | In this work                  |
| TiO <sub>2</sub> /SnO <sub>2</sub>      | FTO/TiO <sub>2</sub> /SnO <sub>2</sub> /Rb <sub>0.05</sub> (FAPbI <sub>3</sub> ) <sub>0.95</sub> (MAPbBr <sub>3</sub> ) <sub>0.05</sub> /PTAA | 1.045 | 23.13 | 73.42 | 17.74 | Diethyl ether | In this work                  |
| TiO <sub>2</sub>                        | FTO/TiO <sub>2</sub> /Rb <sub>0.05</sub> (FAPbI <sub>3</sub> ) <sub>0.95</sub> (MAPbBr <sub>3</sub> ) <sub>0.05</sub> /PTAA                   | 1.052 | 22.17 | 0.73  | 17.03 | TFT           | In this work                  |
| TiO <sub>2</sub> /SnO <sub>2</sub>      | FTO/TiO <sub>2</sub> /SnO <sub>2</sub> /Rb <sub>0.05</sub> (FAPbI <sub>3</sub> ) <sub>0.95</sub> (MAPbBr <sub>3</sub> ) <sub>0.05</sub> /PTAA | 1.085 | 23.30 | 0.83  | 20.98 | TFT           | In this work                  |

**Note:** Please consider the normal composition of each perovskite precursor. All devices were completed by Au top contacts if not mentioned. (i) FAMA: (FAPbI<sub>3</sub>)<sub>0.85</sub>(MAPbBr<sub>3</sub>)<sub>0.85</sub> (ii) CsFAMA: CsI<sub>0.05</sub>[(FAPbI<sub>3</sub>)<sub>0.85</sub>(MAPbBr<sub>3</sub>)<sub>0.85</sub>]<sub>0.95</sub>, (iii) RbFAMA: RbI<sub>0.05</sub>[(FAPbI<sub>3</sub>)<sub>0.85</sub>(MAPbBr<sub>3</sub>)<sub>0.85</sub>]<sub>0.95</sub>, spiro: spiro-OMeTAD
